# Supplementary material for: Crystallographic-plane tuned Prussian-blue wrapped with RGO: a high-capacity, long-life cathode for sodium-ion batteries
Source: Royal Society of Chemistry journal article supplement (doi:10.1039/c6ta10592k), 2017-01-01
Supplement: c6ta10592k1.pdf [file c6ta10592k1.pdf]

## Supporting Information for

### Crystallographic-plane tuned Prussian-blue wrapped with RGO: A high-capacity, long-life cathode for sodium-ion batteries

Hui Wang<sup>a</sup>, Li Wang<sup>b</sup>, Shuangming Chen<sup>c</sup>, Guopeng Li<sup>a</sup>, Junjie Quan<sup>a</sup>, Enze Xu<sup>a</sup>, Li Song<sup>\*c</sup>,  
Yang Jiang <sup>\*a</sup>

---

<sup>a</sup>Dr. Hui Wang, Dr. Guopeng Li, Dr. Junjie Quan, Dr. Enze Xu, Prof. Yang Jiang

School of Materials Science and Engineering, Hefei University of Technology, Hefei, Anhui 230009, P. R. China. \*E-mail:  
apjiang@hfut.edu.cn

<sup>b</sup>Dr. Li Wang

School of Chemistry and Chemical Engineering, Hefei University of Technology, Hefei, Anhui 230009, P. R. China

<sup>c</sup>Dr. Shuangming Cheng, Prof. Li Song

National Synchrotron Radiation Laboratory, CAS Hefei Science Center, University of Science and Technology of China,  
Hefei 230029, China.

E-mail:song2012@ustc.edu.cn

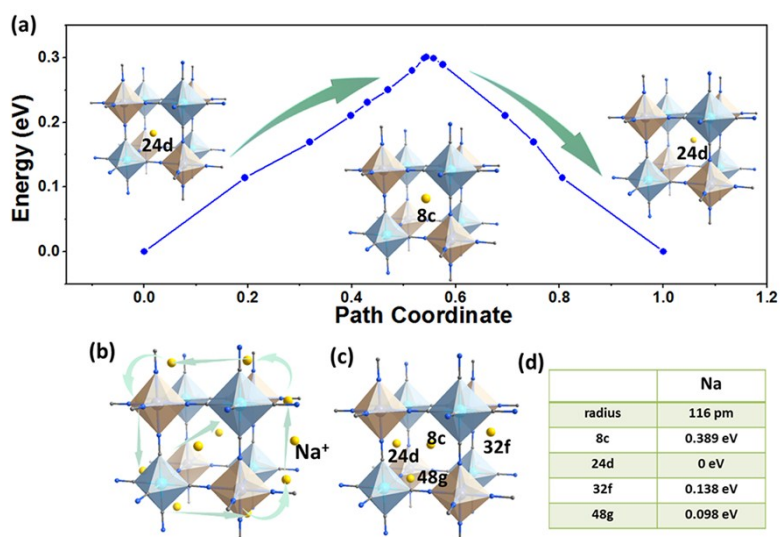

**Fig. S1** (a) and (b) indicate the sodium diffusion direction together with the energy barrier. (c) and (d) present the possible Na-ion accommodation sites and relative binding energy.

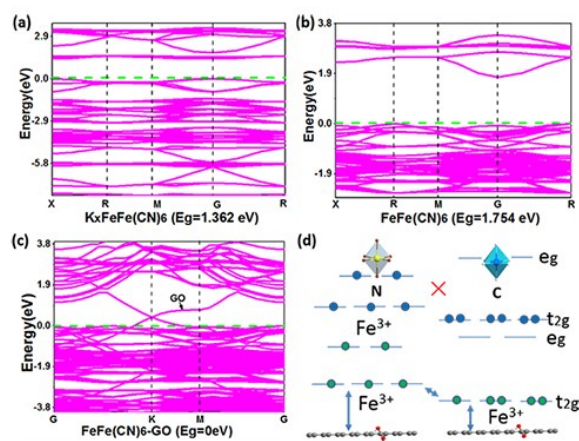

**Fig. S2.** (a), (b) and (c) indicate the band structure of  $K_{0.33}FeFe(CN)_6$ ,  $FeFe(CN)_6$ , together with the  $FeFe(CN)_6/RGO$ .

(d) shows the presence of RGO could facilitate the electronic diffusion, thus leading to better electrochemical performance.

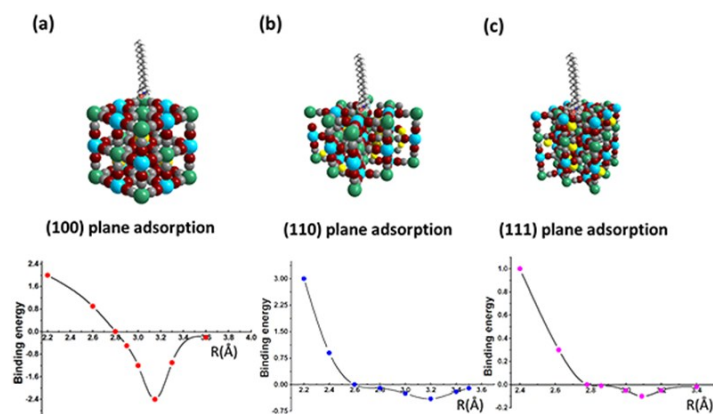

**Fig. S3.** CTAB adsorption on the (100), (110), (111) plane of  $K_{0.33}FeFe(CN)_6$  and the corresponding energy adsorption curves.

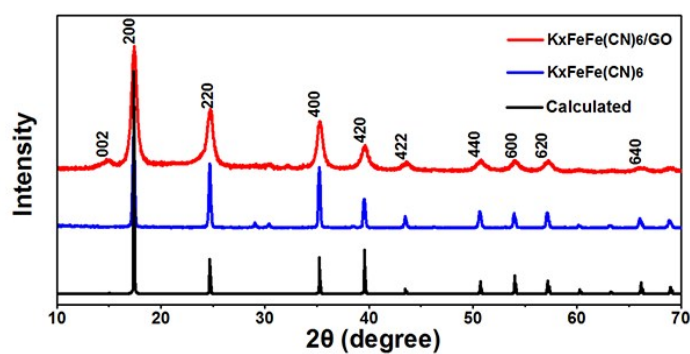

**Figure S4.** XRD pattern of  $K_{0.33}FeFe(CN)_6$  and  $K_{0.33}FeFe(CN)_6/GO$ .

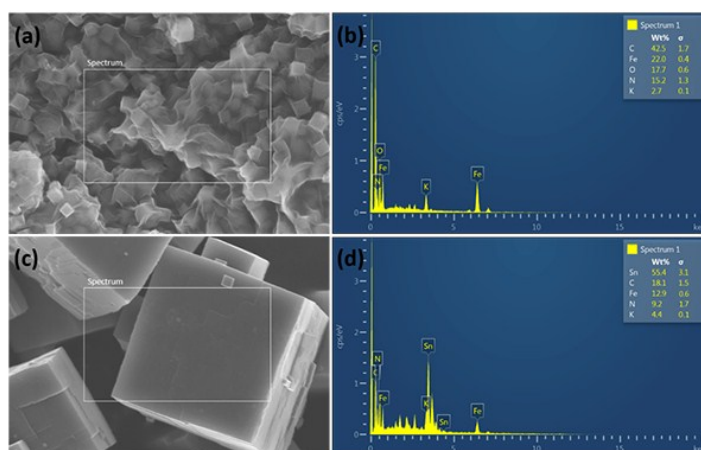

**Fig. S5.** EDS pattern of  $K_{0.33}FeFe(CN)_6$  and  $K_{0.33}FeFe(CN)_6/RGO$ .

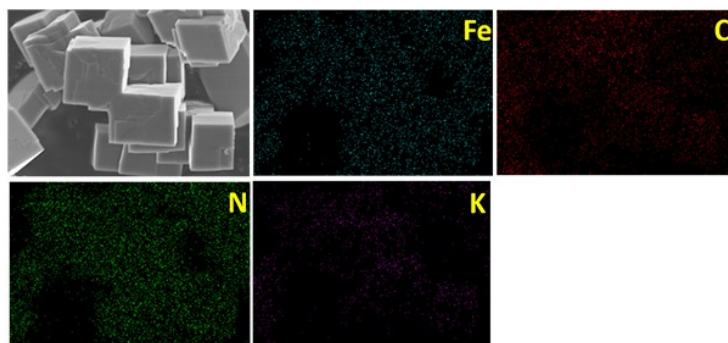

Fig. S6. Elemental mapping images of  $K_{0.33}FeFe(CN)_6$ .

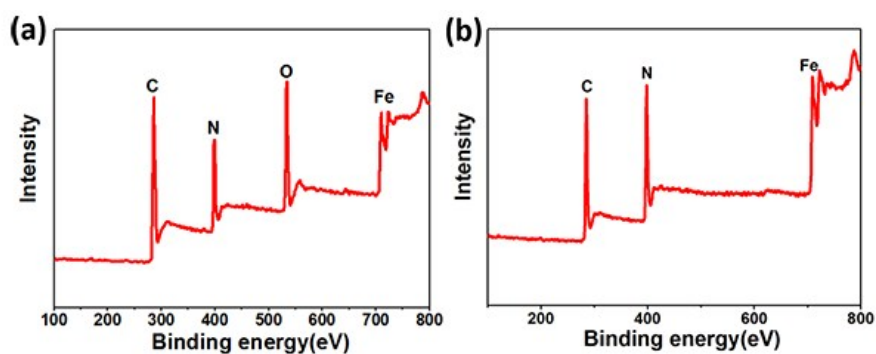

Fig. S7. XPS survey spectra of  $K_{0.33}FeFe(CN)_6$  and  $K_{0.33}FeFe(CN)_6/RGO$ .

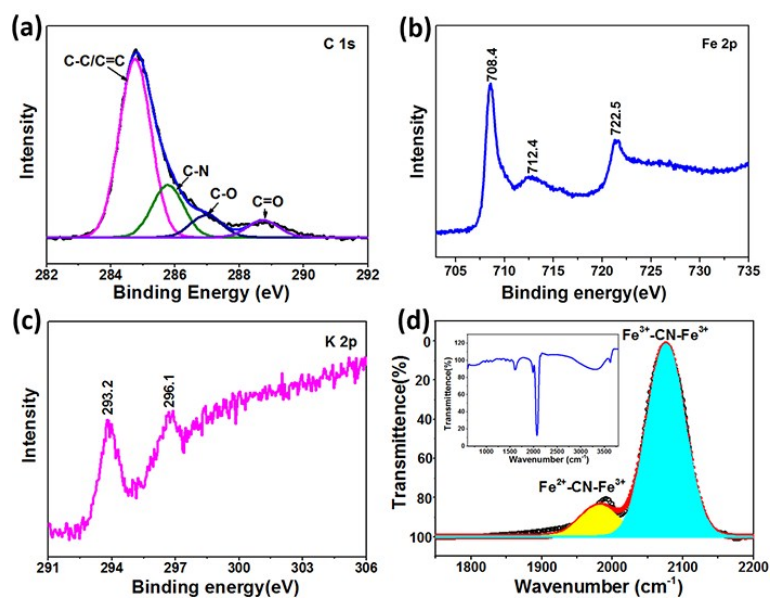

Fig. S8. (a) C 1s spectra. (b) Fe 2p spectra. (c) K 2p spectra. (d) FT-IR spectra of  $K_{0.33}FeFe(CN)_6/RGO$ .

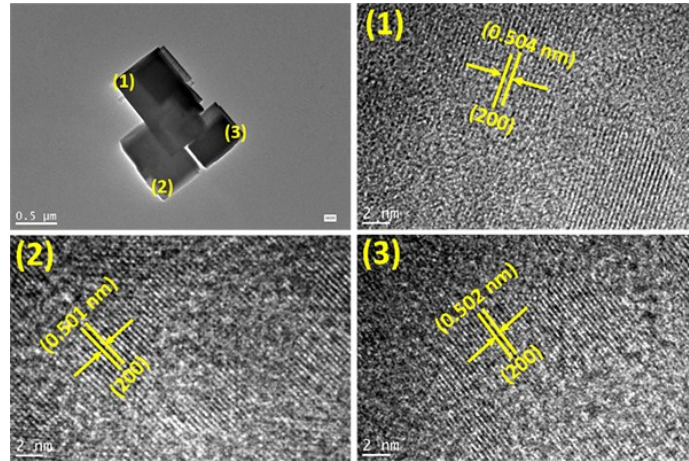

Fig.S9. HRTEM images of  $K_{0.33}FeFe(CN)_6$  micro cubes under low and high resolution.

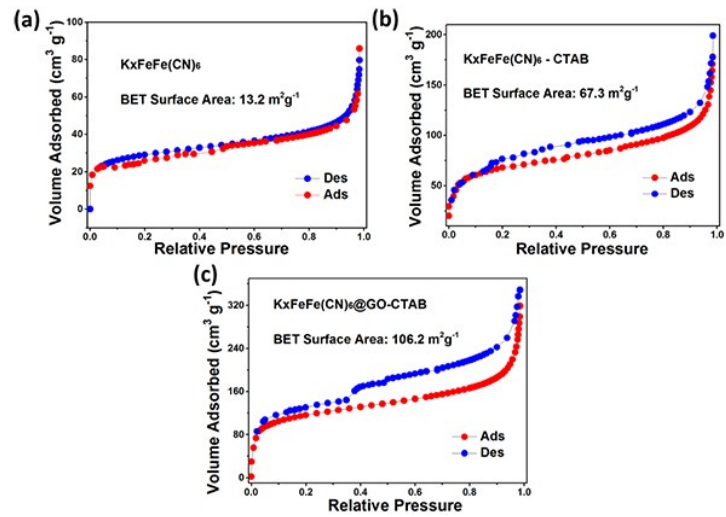

Fig. S10. BET surface of irregular-shaped  $K_{0.33}FeFe(CN)_6$ ,  $K_{0.33}FeFe(CN)_6$  micro cube,  $K_{0.33}FeFe(CN)_6/RGO$ .

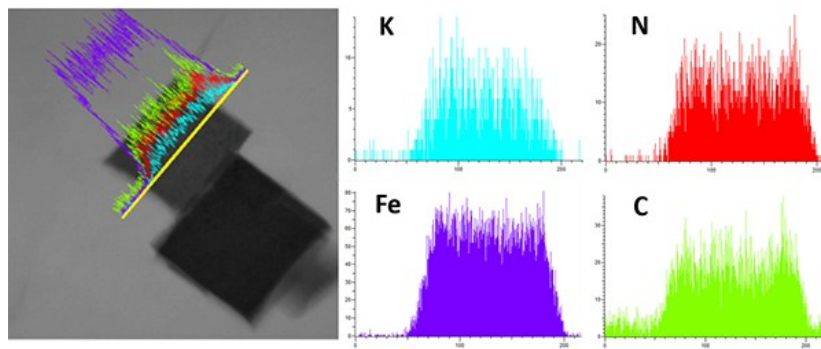

**Fig. S11.** Energy dispersive X-ray spectroscopy (EDX) line scans of  $K_{0.33}FeFe(CN)_6/RGO$ .

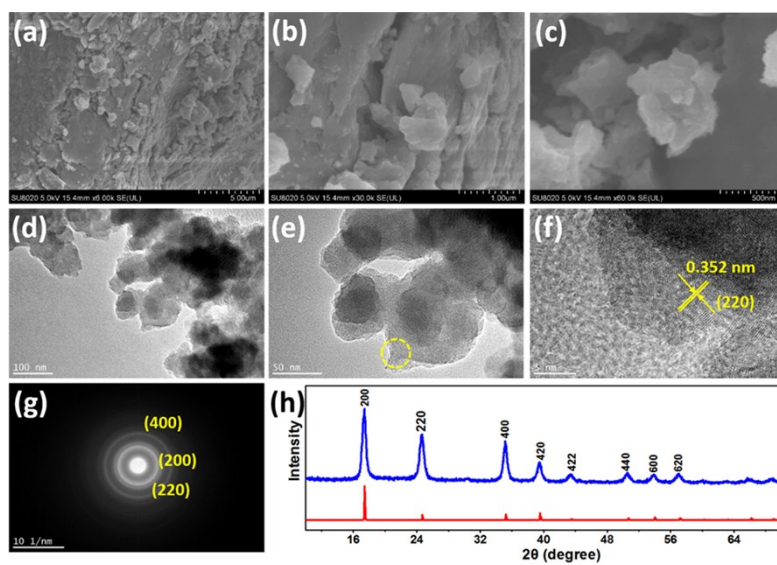

**Fig. S12.** (a), (b) and (c) represent the SEM images of  $K_{0.33}FeFe(CN)_6/RGO$  synthesised without CTAB. (d), (e), (f) are the TEM images of  $K_{0.33}FeFe(CN)_6$ . (g) and (h) display the corresponding SAED and XRD pattern.



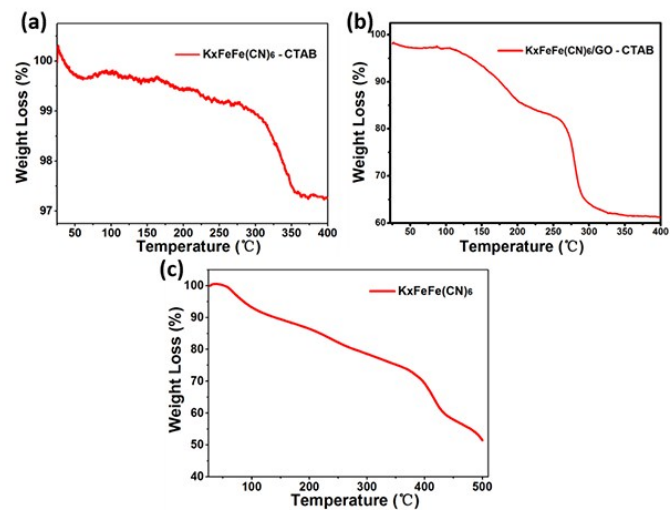

**Fig. S13.** TG curves of  $K_{0.33}FeFe(CN)_6$  micro cube,  $K_{0.33}FeFe(CN)_6/RGO$  and irregular-shaped  $K_{0.33}FeFe(CN)_6$

particle.

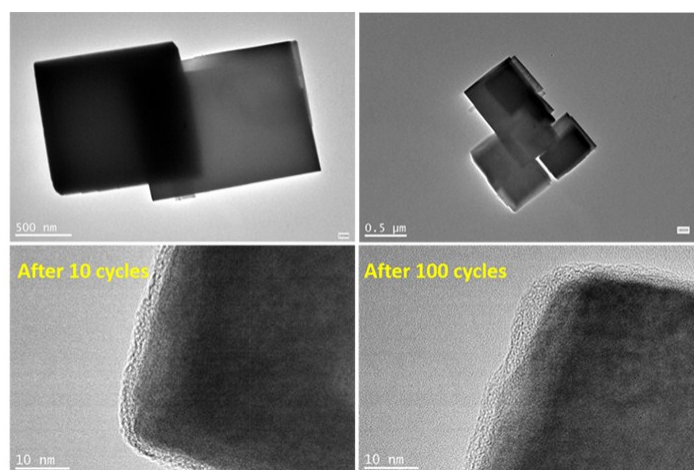

**Fig. S14.** TEM images of  $K_{0.33}FeFe(CN)_6$  sample after 0, 10,100 cycles.

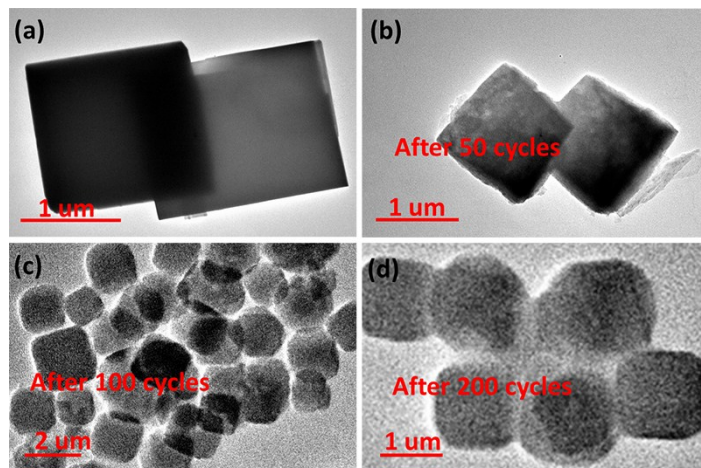

**Fig. S15.** (a), (b), (c) and (d) are TEM images of  $K_{0.33}FeFe(CN)_6$  microcube after 50, 100, and 200 cycles respectively.

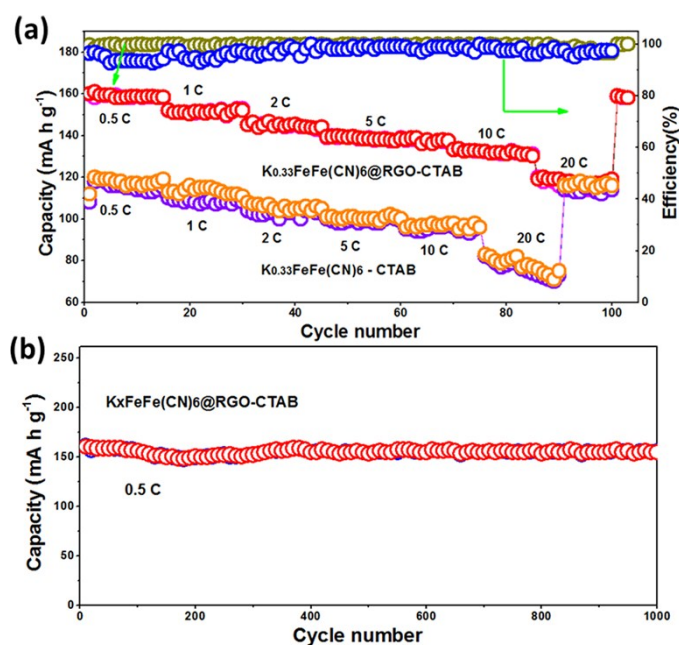

**Fig. S16.** (a) Rate performances of  $K_{0.33}FeFe(CN)_6/RGO$  nanocube and  $K_{0.33}FeFe(CN)_6$  microcube . (b) Long-cycling performances of  $K_{0.33}FeFe(CN)_6/RGO$  nanocube at 0.5 C.



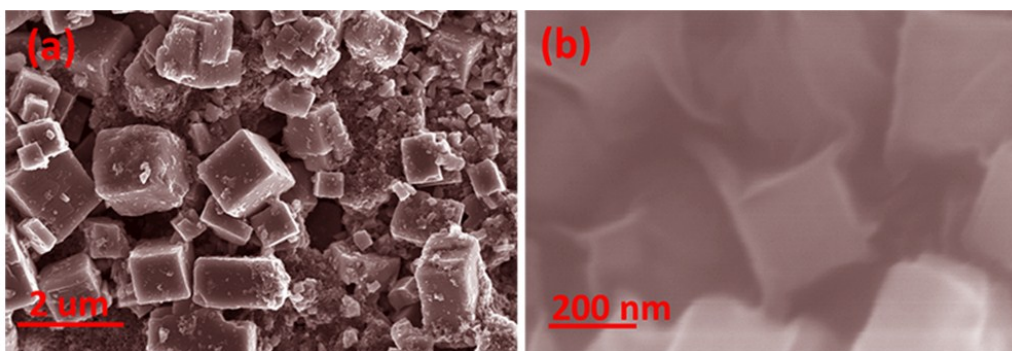

**Fig.S17.** (a) and (b) are SEM images of  $K_{0.33}FeFe(CN)_6$  and  $K_{0.33}FeFe(CN)_6/RGO$  after 250 and 1000 cycles respectively.

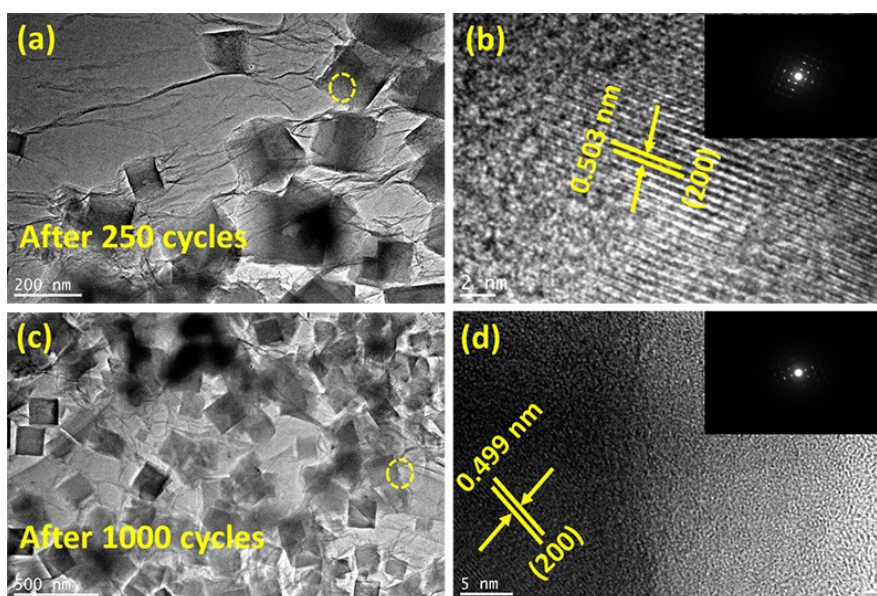

**Fig.S18.** (a) and (c) are TEM images of  $K_{0.33}FeFe(CN)_6/RGO$  after 250 and 1000 cycles respectively. (c) and (d) are HRTEM of  $K_{0.33}FeFe(CN)_6/RGO$  after 250 and 1000 cycles respectively, and the inset shows the corresponding SAED pattern.

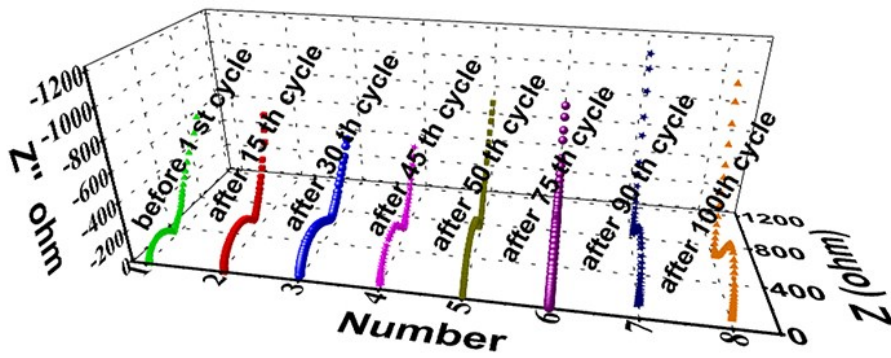

Fig. S19. Nyquist plots of the  $K_{0.33}FeFe(CN)_6/RGO$  nanocube electrodes.

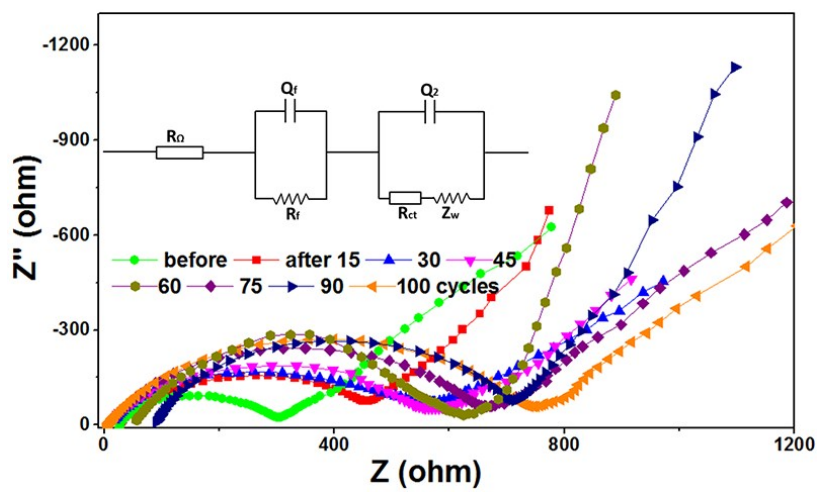

Fig. S20. Nyquist plots of the  $K_{0.33}FeFe(CN)_6/RGO$  nanocube electrodes and the corresponding equivalent circuit

model of the studied system.

| (a)                  |                     |                     |                     |                               |       |  |
|----------------------|---------------------|---------------------|---------------------|-------------------------------|-------|--|
| $K_{0.33}FeFe(CN)_6$ | $a=10.13\text{\AA}$ | $b=10.13\text{\AA}$ | $b=10.13\text{\AA}$ | Volume= $1039.51\text{\AA}^3$ |       |  |
| Atom                 | Wyck                | x                   | y                   | z                             | S.O.F |  |
| Fe1                  | 4a                  | 0                   | 0                   | 0                             | 1     |  |
| Fe                   | 4b                  | 0.5                 | 0                   | 0                             | 1     |  |
| C                    | 24e                 | 0.19                | 0                   | 0                             | 1     |  |
| N                    | 24e                 | 0.31                | 0                   | 0                             | 1     |  |
| K                    | 8c                  | 0.25                | 0.25                | 0.25                          | 0.33  |  |

  

| (b)                           |                       |                       |                       |                               |       |  |
|-------------------------------|-----------------------|-----------------------|-----------------------|-------------------------------|-------|--|
| $K_{0.33}Na_{1.67}FeFe(CN)_6$ | $a=10.2502\text{\AA}$ | $b=10.2501\text{\AA}$ | $b=10.2502\text{\AA}$ | Volume= $1076.94\text{\AA}^3$ |       |  |
| Atom                          | Wyck                  | x                     | y                     | z                             | S.O.F |  |
| Fe1                           | 4a                    | 0.001                 | 0.001                 | 0                             | 1     |  |
| Fe                            | 4b                    | 0.4995                | 0.0005                | 0                             | 1     |  |
| C                             | 24e                   | 0.1901                | 0                     | 0                             | 1     |  |
| N                             | 24e                   | 0.3099                | 0                     | 0                             | 1     |  |
| K                             | 8c                    | 0.2501                | 0.25                  | 0.2498                        | 0.33  |  |
| Na                            | 24d                   | 0                     | 0.2501                | 0.2499                        | 0.28  |  |

Fig. S21. Structure Parameters of  $K_{0.33}FeFe(CN)_6$  and  $K_{0.33}Na_{1.67}FeFe(CN)_6$  simulated by DFT.

**Table S1** Element contents of  $K_{0.33}FeFe(CN)_6/RGO$ 

|                                            | <b>K</b>    | <b>Fe</b>    | <b>C</b>     | <b>N</b>     |
|--------------------------------------------|-------------|--------------|--------------|--------------|
| <b><math>K_{0.33}FeFe(CN)_6/RGO</math></b> | <b>4.3%</b> | <b>36.8%</b> | <b>27.9%</b> | <b>27.6%</b> |

**Table S2** Summary of the representative Prussian-based cathode materials for SIBs

| Typical Sample                        | Cycling performances                                                                      | Rate performances                                                             | References |
|---------------------------------------|-------------------------------------------------------------------------------------------|-------------------------------------------------------------------------------|------------|
| $FeFe(CN)_6$                          | 115 mA h g <sup>-1</sup> at a moderate rate of 60 mA g <sup>-1</sup> after 500 cycles     | 78 mA h g <sup>-1</sup> at 2400 mA g <sup>-1</sup> (20 C)                     | 1          |
| PB/C                                  | 137.6 mA h g <sup>-1</sup> at a moderate rate of 30 mA g <sup>-1</sup> after 500 cycles   | 112 mA h g <sup>-1</sup> at a current density of 800 mA g <sup>-1</sup> (6 C) | 2          |
| PB@C                                  | 123 mA h g <sup>-1</sup> at a moderate rate of 100 mA g <sup>-1</sup> after 300 cycles    | 99 mA h g <sup>-1</sup> at 2000 mA g <sup>-1</sup> (20 C)                     | 3          |
| PB-GO                                 | 139.5 mA h g <sup>-1</sup> at a moderate rate of 25 mA g <sup>-1</sup> after 50 cycles    | 107 mA h g <sup>-1</sup> at 2000 mA g <sup>-1</sup> (20 C)                    | 4          |
| $Na_{1.40}MnFe(CN)_6$                 | 134 mA h g <sup>-1</sup> at a moderate rate of 6 mA g <sup>-1</sup> after 30 cycles       | 73 mA h g <sup>-1</sup> at 2040 mA g <sup>-1</sup> (20 C)                     | 5          |
| $Na_{1.70}FeFe(CN)_6$                 | 91 mA h g <sup>-1</sup> at a moderate rate of 200 mA g <sup>-1</sup> after 100 cycles     | 73.6 mA h g <sup>-1</sup> at 1200 mA g <sup>-1</sup> (10 C)                   | 6          |
| FeNiHCF                               | 101.76 mA h g <sup>-1</sup> at a moderate rate of 10 mA g <sup>-1</sup> after 200 cycles  | 71 mA h g <sup>-1</sup> at 500 mA g <sup>-1</sup> (5 C)                       | 7          |
| $Na_{1.56}Fe[Fe(CN)_6] \cdot 3.1H_2O$ | 99.91 mA h g <sup>-1</sup> at a moderate rate of 20 mA g <sup>-1</sup> after 400 cycles   | 90 mA h g <sup>-1</sup> at 100 mA g <sup>-1</sup> (1 C)                       | 8          |
| FeHCF                                 | 100.1 mA h g <sup>-1</sup> at a moderate rate of 100 mA g <sup>-1</sup> after 70 cycles   | 108 mA h g <sup>-1</sup> at 100 mA g <sup>-1</sup> (1 C)                      | 9          |
| $Na_{0.61}Fe[Fe(CN)_6]_{0.94}$        | 170.1 mA h g <sup>-1</sup> at a moderate rate of 25 mA g <sup>-1</sup> after 150 cycles   | 70 mA h g <sup>-1</sup> at 600 mA g <sup>-1</sup> (5 C)                       | 10         |
| R- $Na_{1.92}Fe[Fe(CN)_6]$            | 117.54 mA h g <sup>-1</sup> at a moderate rate of 10 mA g <sup>-1</sup> after 50 cycles   | 77 mA h g <sup>-1</sup> at 500 mA g <sup>-1</sup> (5 C)                       | 11         |
| $K_{0.33}FeFe(CN)_6-RGO$              | 148.44 mA h g <sup>-1</sup> at a moderate rate of 86 mA g <sup>-1</sup> after 1000 cycles | 126 mA h g <sup>-1</sup> at 2400 mA g <sup>-1</sup> (20 C)                    | This Work  |

**Table S3** Impedance parameters derived from using equivalent circuit model for  $K_{0.33}FeFe(CN)_6/RGO$  electrode.

| Electrode          | $R_f$<br>( $\Omega$ ) | $Q_f$<br>( $\mu F$ ) | $R_{ct}$<br>( $\Omega$ ) | $Q_2$<br>( $\mu F$ ) |
|--------------------|-----------------------|----------------------|--------------------------|----------------------|
| before 1st cycle   | 300.5                 | 280.4                | 200.2                    | 210.6                |
| after 15th cycles  | 450.8                 | 432.7                | 208.4                    | 225.3                |
| after 30th cycles  | 547.6                 | 550.4                | 210.5                    | 228.9                |
| after 45th cycles  | 565.6                 | 560.2                | 223.2                    | 230.3                |
| after 60th cycles  | 620.1                 | 617.3                | 230.6                    | 236.6                |
| after 75 cycles    | 625.6                 | 620.8                | 240.2                    | 245.3                |
| after 90th cycles  | 640.2                 | 630.7                | 260.1                    | 258.3                |
| after 100th cycles | 680.1                 | 676.3                | 270.5                    | 263.4                |

- 1 Wu, X., W. Deng, J. Qian, Y. Cao, X. Ai, H. Yang, *J. Mater. Chem. A*, 2013, **1**, 10130-10134.
- 2 Dezhi, Y., X. Jing, L. Xiao-Zhen, W. Hong, H. Yu-Shi, M. Zi-Feng, *Chemical Communications*, 2015, **51**, 8181-8184.
- 3 Jiang, Y., S. Yu, B. Wang, Y. Li, W. Sun, Y. Lu, M. Yan, B. Song, S. Dou, *Advanced Functional Materials*, 2016, DOI: 10.1002/adfm.201600747
- 4 Prabakar, S.R., J. Jeong, M. Pyo, *RSC Advances*, 2015, **5**, 37545-37552.
- 5 Wang, L., Y. Lu, J. Liu, M. Xu, J. Cheng, D. Zhang, J.B. Goodenough, *Angewandte Chemie International Edition*, 2013, **52**, 1964-1967.
- 6 Liu, Y., Y. Qiao, W. Zhang, Z. Li, X. Ji, L. Miao, L. Yuan, X. Hu, Y. Huang, *Nano Energy*, 2015, **12**, 386-393.
- 7 Yu, S., Y. Li, Y. Lu, B. Xu, Q. Wang, M. Yan, Y. Jiang, *Journal of Power Sources*, 2015, **275**, 45-49.
- 8 Li, W.J., S.L. Chou, J.Z. Wang, Y.M. Kang, J.L. Wang, Y. Liu, Q.F. Gu, H.K. Liu, S.X. Dou, *Chemistry of Materials*, 2015, **27**, 1997-2003.
- 9 Yu, S.-H., M. Shokouhimehr, T. Hyeon, Y.-E. Sung, *ECS Electrochemistry Letters*, 2013, **2**, A39-A41.
- 10 You, Y., X.L. Wu, Y.X. Yin, Y.G. Guo, *Energy Environ Sci*, 2014, **7**, 1643-1647.
- 11 Song, J., L. Wang, Y. Lu, J. Liu, B. Guo, P. Xiao, J.-J. Lee, X.-Q. Yang, G. Henkelman, J.B. Goodenough, *Journal of the American Chemical Society*, 2015, **137**, 2658-2664.
